# Supplementary material for: Nest characteristics determine nest microclimate and affect breeding output in an Antarctic seabird, the Wilson’s storm-petrel
Source: PLoS One. 2019 Jun 13;14(6):e0217708. doi: 10.1371/journal.pone.0217708 (PMC6564424; doi:10.1371/journal.pone.0217708)
Supplement: S10 Table — (CSV) [file pone.0217708.s010.csv]

	Date	Snow.cover	Precipitation
1	2016-05-01	1	0
2	2016-05-02	1	0
3	2016-05-03	1	1
4	2016-05-04	1	0
5	2016-05-05	1	0
6	2016-05-06	1	0
7	2016-05-07	1	0
8	2016-05-08	1	0
9	2016-05-09	1	0
10	2016-05-10	1	0
11	2016-05-11	0	0
12	2016-05-12	0	0
13	2016-05-13	0	0
14	2016-05-14	0	0
15	2016-05-15	0	0
16	2016-05-16	0	0
17	2016-05-17	0	0
18	2016-05-18	0	1
19	2016-05-19	1	1
20	2016-05-20	1	1
21	2016-05-21	1	1
22	2016-05-22	1	1
23	2016-05-23	1	0
24	2016-05-24	1	0
25	2016-05-25	1	0
26	2016-05-26	1	0
27	2016-05-27	0	0
28	2016-05-28	0	0
29	2016-05-29	0	0
30	2016-05-30	0	0
31	2016-05-31	0	1
32	2016-06-01	0	1
33	2016-06-02	1	1
34	2016-06-03	1	0
35	2016-06-04	1	1
36	2016-06-05	1	0
37	2016-06-06	1	0
38	2016-06-07	1	0
39	2016-06-08	1	0
40	2016-06-09	1	0
41	2016-06-10	1	0
42	2016-06-11	1	1
43	2016-06-12	1	1
44	2016-06-13	1	1
45	2016-06-14	1	1
46	2016-06-15	1	1
47	2016-06-16	1	1
48	2016-06-17	0	1
49	2016-06-18	1	1
50	2016-06-19	0	1
51	2016-06-20	1	1
52	2016-06-21	1	1
53	2016-06-22	1	1
54	2016-06-23	1	1
55	2016-06-24	1	1
56	2016-06-25	1	1
57	2016-06-26	1	0
58	2016-06-27	0	1
59	2016-06-28	1	1
60	2016-06-29	1	1
61	2016-06-30	1	0
62	2016-07-01	1	1
63	2016-07-02	1	0
64	2016-07-03	1	1
65	2016-07-04	1	1
66	2016-07-05	1	1
67	2016-07-06	1	1
68	2016-07-07	1	0
69	2016-07-08	1	0
70	2016-07-09	1	0
71	2016-07-10	1	0
72	2016-07-11	1	0
73	2016-07-12	1	1
74	2016-07-13	1	0
75	2016-07-14	1	0
76	2016-07-15	1	0
77	2016-07-16	1	0
78	2016-07-17	1	1
79	2016-07-18	1	1
80	2016-07-19	1	1
81	2016-07-20	1	1
82	2016-07-21	1	1
83	2016-07-22	1	1
84	2016-07-23	1	1
85	2016-07-24	1	0
86	2016-07-25	1	0
87	2016-07-26	1	0
88	2016-07-27	1	0
89	2016-07-28	1	0
90	2016-07-29	1	0
91	2016-07-30	1	0
92	2016-07-31	1	0
93	2016-08-01	1	0
94	2016-08-02	1	0
95	2016-08-03	1	0
96	2016-08-04	1	1
97	2016-08-05	1	1
98	2016-08-06	1	1
99	2016-08-07	1	1
100	2016-08-08	1	1
101	2016-08-09	1	1
102	2016-08-10	1	1
103	2016-08-11	1	0
104	2016-08-12	1	0
105	2016-08-13	1	0
106	2016-08-14	1	1
107	2016-08-15	1	1
108	2016-08-16	1	0
109	2016-08-17	1	1
110	2016-08-18	1	1
111	2016-08-19	1	1
112	2016-08-20	1	1
113	2016-08-21	1	1
114	2016-08-22	1	1
115	2016-08-23	1	0
116	2016-08-24	1	0
117	2016-08-25	1	0
118	2016-08-26	1	0
119	2016-08-27	1	0
120	2016-08-28	1	1
121	2016-08-29	1	1
122	2016-08-30	1	1
123	2016-08-31	1	1
124	2016-09-01	1	1
125	2016-09-02	1	0
126	2016-09-03	1	1
127	2016-09-04	1	1
128	2016-09-05	1	1
129	2016-09-06	1	1
130	2016-09-07	0	1
131	2016-09-08	0	1
132	2016-09-09	0	1
133	2016-09-10	0	1
134	2016-09-11	0	0
135	2016-09-12	0	0
136	2016-09-13	0	1
137	2016-09-14	1	1
138	2016-09-15	0	1
139	2016-09-16	1	0
140	2016-09-17	0	1
141	2016-09-18	0	1
142	2016-09-19	0	1
143	2016-09-20	0	0
144	2016-09-21	0	1
145	2016-09-22	0	1
146	2016-09-23	1	1
147	2016-09-24	1	1
148	2016-09-25	0	1
149	2016-09-26	1	1
150	2016-09-27	0	1
151	2016-09-28	0	1
152	2016-09-29	0	1
153	2016-09-30	0	1
154	2016-10-01	0	0
155	2016-10-02	0	1
156	2016-10-03	0	1
157	2016-10-04	0	0
158	2016-10-05	0	0
159	2016-10-06	0	1
160	2016-10-07	0	0
161	2016-10-08	0	1
162	2016-10-09	0	0
163	2016-10-10	0	0
164	2016-10-11	0	1
165	2016-10-12	0	1
166	2016-10-13	0	1
167	2016-10-14	0	1
168	2016-10-15	0	1
169	2016-10-16	0	0
170	2016-10-17	0	0
171	2016-10-18	0	1
172	2016-10-19	0	0
173	2016-10-20	0	1
174	2016-10-21	0	1
175	2016-10-22	0	1
176	2016-10-23	0	0
177	2016-10-24	0	1
178	2016-10-25	0	0
179	2016-10-26	0	0
180	2016-10-27	0	0
181	2016-10-28	0	0
182	2016-10-29	0	1
183	2016-10-30	0	1
184	2016-10-31	0	1
185	2016-11-01	1	1
186	2016-11-02	1	1
187	2016-11-03	1	1
188	2016-11-04	0	1
189	2016-11-05	1	1
190	2016-11-06	0	0
191	2016-11-07	0	0
192	2016-11-08	0	0
193	2016-11-09	0	0
194	2016-11-10	0	0
195	2016-11-11	0	0
196	2016-11-12	1	1
197	2016-11-13	0	0
198	2016-11-14	0	0
199	2016-11-15	0	0
200	2016-11-16	0	0
201	2016-11-17	0	0
202	2016-11-18	0	0
203	2016-11-19	0	0
204	2016-11-20	0	0
205	2016-11-21	0	1
206	2016-11-22	0	1
207	2016-11-23	0	1
208	2016-11-24	0	1
209	2016-11-25	0	0
210	2016-11-26	0	1
211	2016-11-27	0	1
212	2016-11-28	0	1
213	2016-11-29	0	1
214	2016-11-30	0	1
215	2016-12-01	1	1
216	2016-12-02	0	0
217	2016-12-03	0	0
218	2016-12-04	0	0
219	2016-12-05	0	0
220	2016-12-06	0	0
221	2016-12-07	1	1
222	2016-12-08	0	1
223	2016-12-09	0	0
224	2016-12-10	0	0
225	2016-12-11	0	0
226	2016-12-12	0	0
227	2016-12-13	0	0
228	2016-12-14	0	0
229	2016-12-15	0	1
230	2016-12-16	0	1
231	2016-12-17	1	1
232	2016-12-18	0	1
233	2016-12-19	1	1
234	2016-12-20	1	1
235	2016-12-21	0	1
236	2016-12-22	1	1
237	2016-12-23	0	0
238	2016-12-24	1	1
239	2016-12-25	0	0
240	2016-12-26	0	1
241	2016-12-27	0	0
242	2016-12-28	0	0
243	2016-12-29	0	0
244	2016-12-30	0	0
245	2016-12-31	0	0
246	2017-01-01	0	0
247	2017-01-02	1	1
248	2017-01-03	0	1
249	2017-01-04	0	0
250	2017-01-05	0	0
251	2017-01-06	0	1
252	2017-01-07	1	1
253	2017-01-08	0	1
254	2017-01-09	0	1
255	2017-01-10	0	1
256	2017-01-11	1	1
257	2017-01-12	0	1
258	2017-01-13	0	0
259	2017-01-14	0	0
260	2017-01-15	0	0
261	2017-01-16	1	1
262	2017-01-17	0	0
263	2017-01-18	0	0
264	2017-01-19	0	0
265	2017-01-20	0	0
266	2017-01-21	0	1
267	2017-01-22	0	1
268	2017-01-23	0	1
269	2017-01-24	0	1
270	2017-01-25	0	1
271	2017-01-26	0	1
272	2017-01-27	0	1
273	2017-01-28	0	0
274	2017-01-29	0	1
275	2017-01-30	0	1
276	2017-01-31	0	0
277	2017-02-01	0	0
278	2017-02-02	0	0
279	2017-02-03	0	1
280	2017-02-04	0	0
281	2017-02-05	0	1
282	2017-02-06	0	0
283	2017-02-07	0	0
284	2017-02-08	0	0
285	2017-02-09	0	0
286	2017-02-10	0	1
287	2017-02-11	0	1
288	2017-02-12	0	0
289	2017-02-13	0	1
290	2017-02-14	0	1
291	2017-02-15	0	1
292	2017-02-16	0	0
293	2017-02-17	0	1
294	2017-02-18	0	0
295	2017-02-19	0	0
296	2017-02-20	0	0
297	2017-02-21	0	1
298	2017-02-22	0	0
299	2017-02-23	0	0
300	2017-02-24	0	1
301	2017-02-25	0	0
302	2017-02-26	1	1
303	2017-02-27	1	1
304	2017-02-28	1	1
305	2017-03-01	0	0
306	2017-03-02	0	0
307	2017-03-03	0	0
308	2017-03-04	0	0
309	2017-03-05	0	0
310	2017-03-06	0	0
311	2017-03-07	0	0
312	2017-03-08	0	0
313	2017-03-09	0	0
314	2017-03-10	0	0
315	2017-03-11	0	0
316	2017-03-12	0	0
317	2017-03-13	0	0
318	2017-03-14	0	1
319	2017-03-15	0	0
320	2017-03-16	0	0
321	2017-03-17	0	1
322	2017-03-18	0	1
323	2017-03-19	0	1
324	2017-03-20	0	0
325	2017-03-21	0	1
326	2017-03-22	0	1
327	2017-03-23	0	0
328	2017-03-24	0	0
329	2017-03-25	0	0
330	2017-03-26	0	1
331	2017-03-27	0	1
332	2017-03-28	0	1
333	2017-03-29	0	0
334	2017-03-30	0	1
335	2017-03-31	0	0
336	2017-04-01	0	1
337	2017-04-02	0	0
338	2017-04-03	0	0
339	2017-04-04	1	1
340	2017-04-05	0	0
341	2017-04-06	0	0
342	2017-04-07	0	0
343	2017-04-08	0	1
344	2017-04-09	0	1
345	2017-04-10	0	1
346	2017-04-11	0	0
347	2017-04-12	0	1
348	2017-04-13	0	1
349	2017-04-14	1	1
350	2017-04-15	0	0
351	2017-04-16	0	0
352	2017-04-17	0	0
353	2017-04-18	0	0
354	2017-04-19	1	1
355	2017-04-20	1	1
356	2017-04-21	1	1
357	2017-04-22	0	0
358	2017-04-23	0	0
359	2017-04-24	0	0
360	2017-04-25	1	1
361	2017-04-26	0	0
362	2017-04-27	0	0
363	2017-04-28	0	0
364	2017-04-29	0	0
365	2017-04-30	0	0
366	2017-05-01	1	1
367	2017-05-02	1	1
368	2017-05-03	1	1
369	2017-05-04	1	1
370	2017-05-05	1	1
371	2017-05-06	0	0
372	2017-05-07	1	1
373	2017-05-08	1	1
374	2017-05-09	0	1
375	2017-05-10	0	1
376	2017-05-11	1	1
377	2017-05-12	1	1
378	2017-05-13	1	1
379	2017-05-14	0	0
380	2017-05-15	0	1
381	2017-05-16	0	1
382	2017-05-17	1	1
383	2017-05-18	0	1
384	2017-05-19	0	1
385	2017-05-20	0	1
386	2017-05-21	1	1
387	2017-05-22	1	1
388	2017-05-23	1	1
389	2017-05-24	0	0
390	2017-05-25	1	1
391	2017-05-26	1	1
392	2017-05-27	1	1
393	2017-05-28	0	0
394	2017-05-29	1	0
395	2017-05-30	1	0
396	2017-05-31	1	0
397	2017-06-01	1	0
398	2017-06-02	1	0
399	2017-06-03	1	0
400	2017-06-04	1	1
401	2017-06-05	1	1
402	2017-06-06	1	0
403	2017-06-07	1	0
404	2017-06-08	1	1
405	2017-06-09	1	1
406	2017-06-10	1	1
407	2017-06-11	1	1
408	2017-06-12	1	1
409	2017-06-13	1	1
410	2017-06-14	1	1
411	2017-06-15	1	1
412	2017-06-16	1	0
413	2017-06-17	1	0
414	2017-06-18	1	1
415	2017-06-19	1	1
416	2017-06-20	1	1
417	2017-06-21	1	1
418	2017-06-22	1	0
419	2017-06-23	1	1
420	2017-06-24	1	1
421	2017-06-25	1	1
422	2017-06-26	1	1
423	2017-06-27	1	1
424	2017-06-28	1	1
425	2017-06-29	1	1
426	2017-06-30	1	1
427	2017-07-01	1	1
428	2017-07-02	1	1
429	2017-07-03	1	1
430	2017-07-04	1	1
431	2017-07-05	1	1
432	2017-07-06	1	1
433	2017-07-07	1	0
434	2017-07-08	1	1
435	2017-07-09	1	1
436	2017-07-10	1	1
437	2017-07-11	1	1
438	2017-07-12	1	0
439	2017-07-13	1	1
440	2017-07-14	1	1
441	2017-07-15	1	1
442	2017-07-16	1	0
443	2017-07-17	1	1
444	2017-07-18	1	1
445	2017-07-19	1	1
446	2017-07-20	1	0
447	2017-07-21	1	0
448	2017-07-22	1	1
449	2017-07-23	1	1
450	2017-07-24	1	1
451	2017-07-25	1	1
452	2017-07-26	1	1
453	2017-07-27	1	1
454	2017-07-28	1	1
455	2017-07-29	1	1
456	2017-07-30	1	1
457	2017-07-31	1	1
458	2017-08-01	1	1
459	2017-08-02	1	1
460	2017-08-03	1	1
461	2017-08-04	1	1
462	2017-08-05	1	1
463	2017-08-06	1	1
464	2017-08-07	1	0
465	2017-08-08	1	0
466	2017-08-09	1	0
467	2017-08-10	1	1
468	2017-08-11	1	1
469	2017-08-12	1	1
470	2017-08-13	1	0
471	2017-08-14	1	1
472	2017-08-15	1	1
473	2017-08-16	1	1
474	2017-08-17	1	1
475	2017-08-18	1	1
476	2017-08-19	1	0
477	2017-08-20	1	0
478	2017-08-21	1	1
479	2017-08-22	1	1
480	2017-08-23	1	1
481	2017-08-24	1	1
482	2017-08-25	1	1
483	2017-08-26	1	1
484	2017-08-27	1	1
485	2017-08-28	1	1
486	2017-08-29	1	1
487	2017-08-30	1	1
488	2017-08-31	1	1
489	2017-09-01	1	1
490	2017-09-02	1	1
491	2017-09-03	1	1
492	2017-09-04	1	1
493	2017-09-05	1	1
494	2017-09-06	1	1
495	2017-09-07	1	0
496	2017-09-08	1	1
497	2017-09-09	1	1
498	2017-09-10	1	1
499	2017-09-11	1	1
500	2017-09-12	1	1
501	2017-09-13	1	1
502	2017-09-14	1	1
503	2017-09-15	1	0
504	2017-09-16	1	1
505	2017-09-17	1	1
506	2017-09-18	1	1
507	2017-09-19	1	1
508	2017-09-20	1	0
509	2017-09-21	1	1
510	2017-09-22	1	1
511	2017-09-23	1	0
512	2017-09-24	1	1
513	2017-09-25	1	1
514	2017-09-26	1	1
515	2017-09-27	1	1
516	2017-09-28	1	1
517	2017-09-29	1	1
518	2017-09-30	1	1
519	2017-10-01	1	0
520	2017-10-02	1	1
521	2017-10-03	1	1
522	2017-10-04	1	1
523	2017-10-05	1	1
524	2017-10-06	1	1
525	2017-10-07	1	0
526	2017-10-08	1	0
527	2017-10-09	1	1
528	2017-10-10	1	0
529	2017-10-11	1	0
530	2017-10-12	1	1
531	2017-10-13	1	1
532	2017-10-14	1	0
533	2017-10-15	1	0
534	2017-10-16	1	1
535	2017-10-17	1	1
536	2017-10-18	1	1
537	2017-10-19	1	0
538	2017-10-20	1	0
539	2017-10-21	1	1
540	2017-10-22	1	1
541	2017-10-23	1	1
542	2017-10-24	1	1
543	2017-10-25	1	1
544	2017-10-26	1	1
545	2017-10-27	1	0
546	2017-10-28	1	0
547	2017-10-29	1	0
548	2017-10-30	1	0
549	2017-10-31	1	1
550	2017-11-01	1	1
551	2017-11-02	1	1
552	2017-11-03	1	0
553	2017-11-04	1	1
554	2017-11-05	1	0
555	2017-11-06	1	0
556	2017-11-07	1	0
557	2017-11-08	1	0
558	2017-11-09	1	1
559	2017-11-10	1	1
560	2017-11-11	1	1
561	2017-11-12	1	1
562	2017-11-13	1	0
563	2017-11-14	1	0
564	2017-11-15	1	0
565	2017-11-16	1	1
566	2017-11-17	1	1
567	2017-11-18	1	1
568	2017-11-19	1	1
569	2017-11-20	1	1
570	2017-11-21	1	0
571	2017-11-22	1	1
572	2017-11-23	1	1
573	2017-11-24	1	1
574	2017-11-25	1	0
575	2017-11-26	1	0
576	2017-11-27	1	0
577	2017-11-28	1	1
578	2017-11-29	1	1
579	2017-11-30	1	1
580	2017-12-01	1	1
581	2017-12-02	1	1
582	2017-12-03	1	1
583	2017-12-04	1	0
584	2017-12-05	1	0
585	2017-12-06	1	0
586	2017-12-07	1	0
587	2017-12-08	1	1
588	2017-12-09	1	0
589	2017-12-10	1	1
590	2017-12-11	1	1
591	2017-12-12	1	0
592	2017-12-13	1	0
593	2017-12-14	1	1
594	2017-12-15	1	1
595	2017-12-16	1	1
596	2017-12-17	1	1
597	2017-12-18	1	1
598	2017-12-19	1	1
599	2017-12-20	1	1
600	2017-12-21	1	1
601	2017-12-22	0	1
602	2017-12-23	0	1
603	2017-12-24	0	1
604	2017-12-25	0	1
605	2017-12-26	0	0
606	2017-12-27	0	1
607	2017-12-28	0	1
608	2017-12-29	0	1
609	2017-12-30	0	1
610	2017-12-31	0	1
611	2018-01-01	0	1
612	2018-01-02	0	1
613	2018-01-03	0	1
614	2018-01-04	0	0
615	2018-01-05	0	1
616	2018-01-06	0	0
617	2018-01-07	0	0
618	2018-01-08	0	0
619	2018-01-09	0	1
620	2018-01-10	0	1
621	2018-01-11	0	1
622	2018-01-12	0	1
623	2018-01-13	1	1
624	2018-01-14	1	1
625	2018-01-15	0	0
626	2018-01-16	0	0
627	2018-01-17	0	1
628	2018-01-18	0	1
629	2018-01-19	0	0
630	2018-01-20	0	1
631	2018-01-21	0	1
632	2018-01-22	0	1
633	2018-01-23	0	1
634	2018-01-24	0	1
635	2018-01-25	0	1
636	2018-01-26	0	1
637	2018-01-27	0	1
638	2018-01-28	0	1
639	2018-01-29	0	1
640	2018-01-30	1	1
641	2018-01-31	1	1
642	2018-02-01	1	1
643	2018-02-02	0	1
644	2018-02-03	0	1
645	2018-02-04	0	1
646	2018-02-05	0	1
647	2018-02-06	0	1
648	2018-02-07	0	1
649	2018-02-08	0	1
650	2018-02-09	1	0
651	2018-02-10	0	0
652	2018-02-11	0	1
653	2018-02-12	0	0
654	2018-02-13	0	1
655	2018-02-14	0	0
656	2018-02-15	0	1
657	2018-02-16	0	1
658	2018-02-17	0	1
659	2018-02-18	0	1
660	2018-02-19	0	0
661	2018-02-20	0	1
662	2018-02-21	0	1
663	2018-02-22	0	1
664	2018-02-23	0	1
665	2018-02-24	0	1
666	2018-02-25	0	1
667	2018-02-26	0	1
668	2018-02-27	0	1
669	2018-02-28	0	1
670	2018-03-01	0	1
671	2018-03-02	0	1
672	2018-03-03	1	1
673	2018-03-04	1	1
674	2018-03-05	0	1
675	2018-03-06	1	1
676	2018-03-07	1	1
677	2018-03-08	1	1
678	2018-03-09	1	0
679	2018-03-10	1	1
680	2018-03-11	1	1
681	2018-03-12	0	1
682	2018-03-13	0	1
683	2018-03-14	0	1
684	2018-03-15	1	1
685	2018-03-16	1	1
686	2018-03-17	1	0
687	2018-03-18	1	1
688	2018-03-19	1	0
689	2018-03-20	1	1
690	2018-03-21	0	1
691	2018-03-22	0	1
692	2018-03-23	0	1
693	2018-03-24	0	1
694	2018-03-25	0	1
695	2018-03-26	0	1
696	2018-03-27	0	1
697	2018-03-28	0	1
698	2018-03-29	0	1
699	2018-03-30	0	1
700	2018-03-31	0	1
701	2018-04-01	0	0
702	2018-04-02	0	1
703	2018-04-03	0	1
704	2018-04-04	0	0
705	2018-04-05	0	1
706	2018-04-06	1	0
707	2018-04-07	1	0
708	2018-04-08	1	1
709	2018-04-09	1	1
710	2018-04-10	1	1
711	2018-04-11	1	1
712	2018-04-12	1	1
713	2018-04-13	1	1
714	2018-04-14	1	1
715	2018-04-15	1	1
716	2018-04-16	1	1
717	2018-04-17	1	1
718	2018-04-18	1	1
719	2018-04-19	0	1
720	2018-04-20	0	1
721	2018-04-21	0	0
722	2018-04-22	1	0
723	2018-04-23	1	1
724	2018-04-24	1	1
725	2018-04-25	1	1
726	2018-04-26	1	0
727	2018-04-27	1	0
728	2018-04-28	1	1
729	2018-04-29	1	1
730	2018-04-30	1	1
731	2018-05-01	1	1
732	2018-05-02	1	1
733	2018-05-03	1	1
734	2018-05-04	1	1
735	2018-05-05	1	1
736	2018-05-06	1	0
737	2018-05-07	1	0
738	2018-05-08	1	1
739	2018-05-09	1	1
740	2018-05-10	1	1
741	2018-05-11	1	1
742	2018-05-12	1	0
743	2018-05-13	1	1
744	2018-05-14	1	0
745	2018-05-15	1	0
746	2018-05-16	1	0
747	2018-05-17	1	0
748	2018-05-18	1	0
749	2018-05-19	1	1
750	2018-05-20	1	1
751	2018-05-21	1	1
752	2018-05-22	1	0
753	2018-05-23	1	1
754	2018-05-24	1	0
755	2018-05-25	1	1
756	2018-05-26	1	1
757	2018-05-27	1	1
758	2018-05-28	1	1
759	2018-05-29	1	1
760	2018-05-30	1	1
761	2018-05-31	1	0
